# Supplementary material for: Facile one-pot hydrothermal synthesis of particle-based nitrogen-doped carbon spheres and their supercapacitor performance
Source: Royal Society of Chemistry journal article supplement (doi:10.1039/c8nj00576a), 2018-01-01
Supplement: c8nj00576a1.pdf [file c8nj00576a1.pdf]

## Supporting Information

### Facile one-pot hydrothermal synthesis of particle-based nitrogen-doped carbon spheres and their supercapacitor performance

Ang Zhang<sup>1</sup>, Shubo Cao<sup>1</sup>, Yongbin Zhao<sup>3</sup>, Chen Zhang<sup>1</sup> and Aihua Chen<sup>1, 2, \*</sup>

<sup>1</sup>School of Materials Science and Engineering, Beihang University Xueyuan Road 37, Haidian District, Beijing 100191, China.

<sup>2</sup>Beijing Advanced Innovation Centre for Biomedical Engineering, Beihang University, Beijing, China.

<sup>3</sup>Shandong Oubo New Material Co Ltd Dongying Part Economic Development Zone Shandong 257088, China.

\*E-mail: [chenaihua@buaa.edu.cn](mailto:chenaihua@buaa.edu.cn)

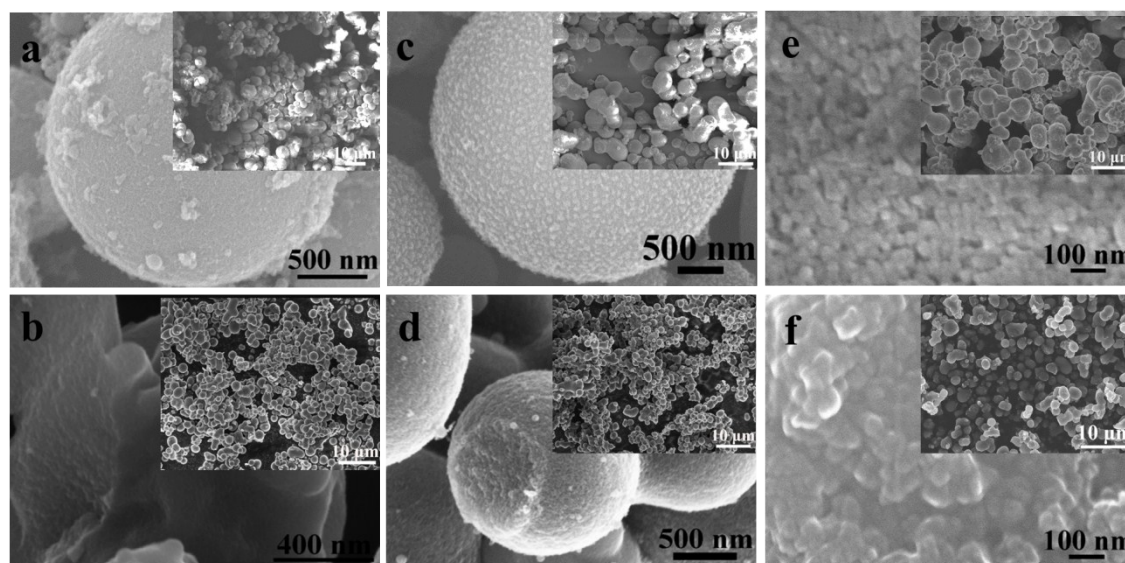

**Fig. S1** SEM images of (a) MFSSs-0.24, (b) NCSs-0.24, (c) MFSSs-0.6, (d) PNCSs-0.6, (e) MFSSs-1.6 and (f) PNCSs-1.6.

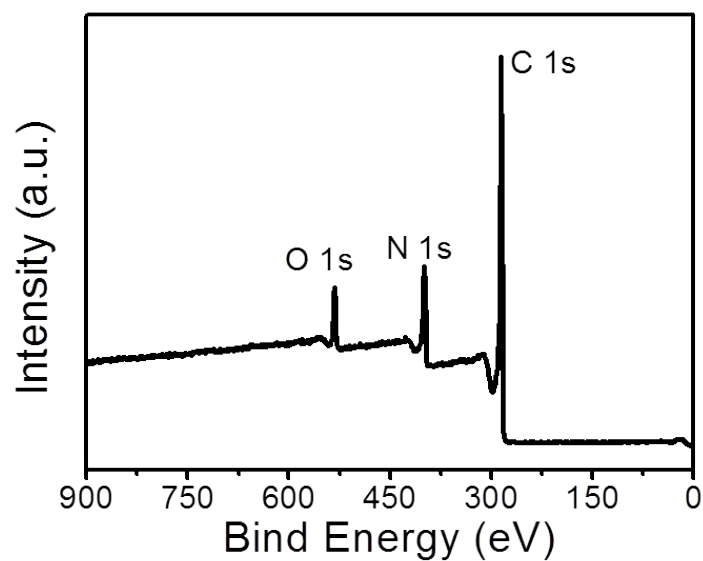

**Fig. S2** XPS spectrum of PNCSs-1.2

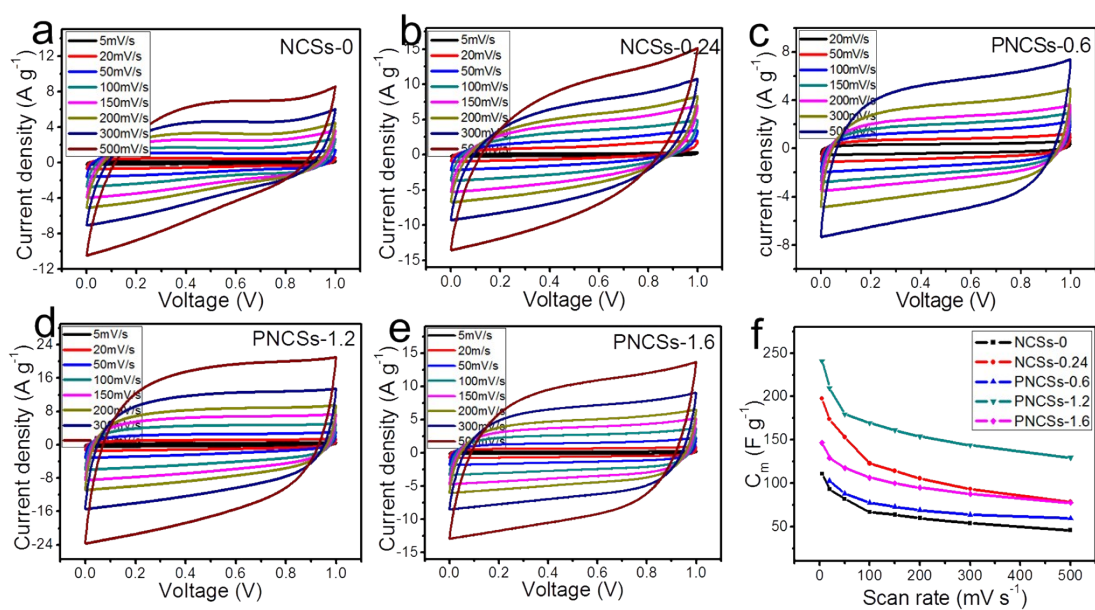

**Fig. S3** (a-e) CV curves at different scan rates: (a) NCSs-0, (b) NCSs-0.24, (c) PNCSs-0.6, (d) PNCSs-1.2 and (e) PNCSs-1.6. (f) Specific capacitances of NCSs-0, NCSs-0.24, PNCSs-0.6, PNCSs-1.2 and PNCSs-1.6 from CV curves

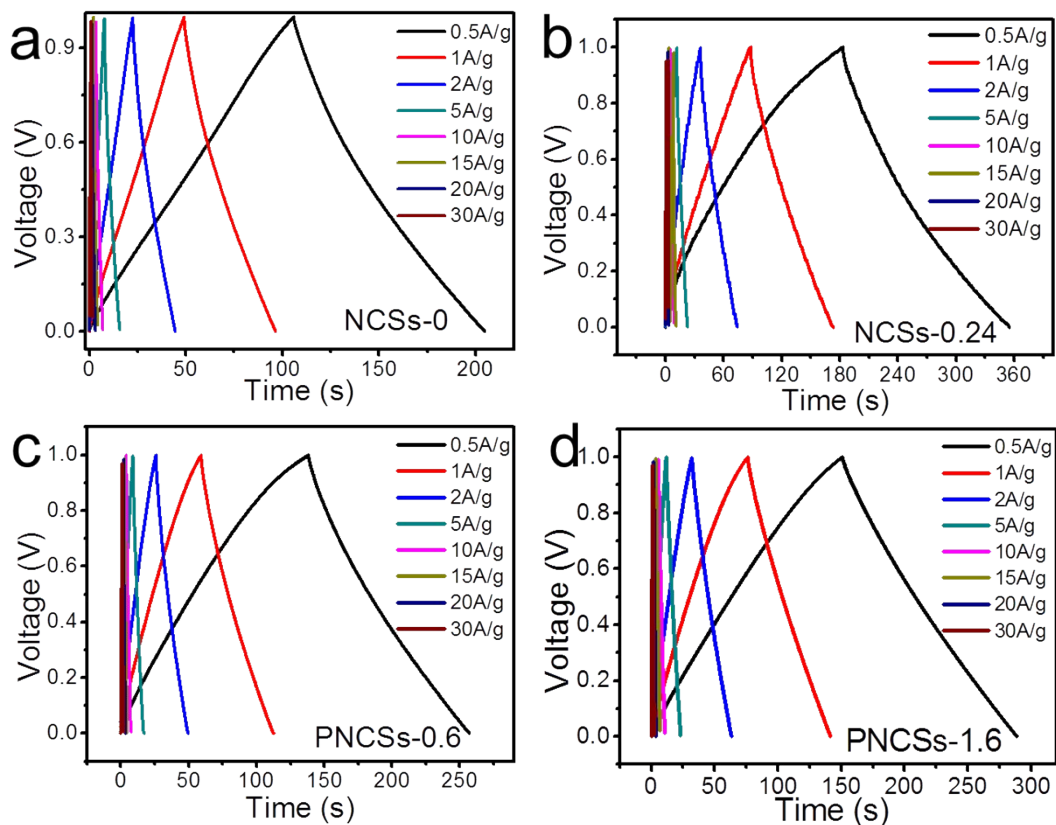

**Fig. S4** (a-b) GCD curves at different current densities of (a) NCSs-0, (b) NCSs-0.24, (c) PNCSSs-0.6 and (d) PNCSSs-1.6

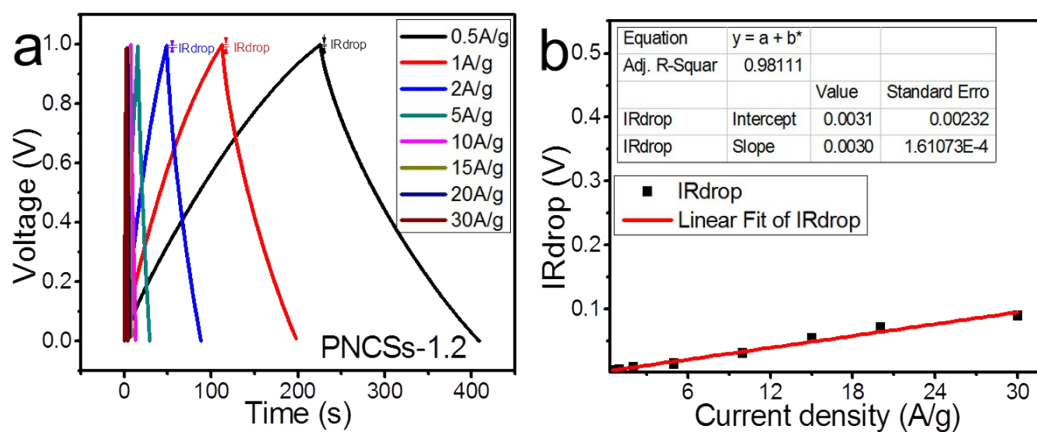

**Fig. S5** (a) GCD curves at different current densities and (b) IR drop at different current densities of PNCSSs-1.2

**Table S1** Comparison of supercapacitor performance among nitrogen-doped carbon materials in literatures.

| Materials          | Electrolyte                        | C/F g <sup>-1</sup><br>(Current density)        | Energy density /Wh kg <sup>-1</sup><br>(Current density) | Reference |
|--------------------|------------------------------------|-------------------------------------------------|----------------------------------------------------------|-----------|
| PNCSS-1.2          | 6 M KOH                            | 204.01 (1 A g <sup>-1</sup> , two-electrode)    | 7.67 (1 A g <sup>-1</sup> )                              | This work |
| N-OMC              | 6 M KOH                            | 216 (0.1 A g <sup>-1</sup> , three-electrode)   | \                                                        | S1        |
| N-MC               | 6 M KOH                            | 205 (0.5 A g <sup>-1</sup> , three-electrode)   | \                                                        | S2        |
| N-HCSs             | 6 M KOH                            | 176 (1 A g <sup>-1</sup> , three-electrode)     | \                                                        | S3        |
| N-HMCSs            | 6 M KOH                            | 170 (1 A g <sup>-1</sup> , three-electrode)     | \                                                        | S4        |
| N-HPC              | 0.1 M KOH                          | 170 (10 mV s <sup>-1</sup> , Three-electrode)   | \                                                        | S5        |
| 3D porous RGO      | 1 M H <sub>2</sub> SO <sub>4</sub> | 284.2 (1 A g <sup>-1</sup> , three-electrode)   | 9.9 (1 A g <sup>-1</sup> )                               | S6        |
| N-CSs              | 1 M H <sub>2</sub> SO <sub>4</sub> | 191.9 (0.1 A g <sup>-1</sup> , three-electrode) | \                                                        | S7        |
| N,P-CNF            | 2 M H <sub>2</sub> SO <sub>4</sub> | 204.9 (1 A g <sup>-1</sup> , three-electrode)   | 7.76 (0.25 A g <sup>-1</sup> )                           | S8        |
| N-CNF              | 6 M KOH                            | 202.0 (1 A g <sup>-1</sup> , three-electrode)   | 7.11 (0.25 A g <sup>-1</sup> )                           | S9        |
| N-activated carbon | 7 M KOH                            | 226 (0.05 A g <sup>-1</sup> , two-electrode)    | \                                                        | S10       |

## References

- [S1] H. Chen, M Zhou, Z Wang, et al. Rich nitrogen-doped ordered mesoporous phenolic resin-based carbon for supercapacitors, *Electrochim. Acta* 148 (2014) 187-194.
- [S2] F Sun, J Gao, Y Yang, et al. One-step ammonia activation of Zhundong coal generating nitrogen-doped microporous carbon for gas adsorption and energy

storage, Carbon 109 (2016) 747-754.

- [S3] A Chen A, Y Li, Y Yu, et al. Nitrogen-doped hollow carbon spheres for supercapacitors application, J. Alloys Compd. 688 (2016) 878-884.
- [S4] J. Han, G. Xu, B. Ding, J. Pan, H. Dou, D.R. MacFarlane, Porous nitrogen-doped hollow carbon spheres derived from polyaniline for high performance supercapacitors, J. Mater. Chem. A 2 (2014) 5352-5357.
- [S5] A Chen, Y Yu, T Xing, R Wang, Y Li, Y Li, Synthesis of nitrogen-doped hierarchical porous carbon for supercapacitors, Mater. Lett. 157 (2015) 30-33.
- [S6] Y Shao, MF El-Kady, C Lin, et al. 3D Freeze-casting of cellular graphene films for ultrahigh-power-density supercapacitors, Adv. Mater. 28(31) (2016) 6719-6726.
- [S7] W H Lee, J H Moon. Monodispersed N-doped carbon nanospheres for supercapacitor application, ACS Appl. Mater. Interfaces 6(16) (2014) 13968-13976.
- [S8] L Chen, Z Huang, H Liang, H Gao, S Yu, Three-dimensional heteroatom-doped carbon nanofiber networks derived from bacterial cellulose for supercapacitors, Adv. Funct. Mater. 24(32) (2015) 5104-5111.
- [S9] L F Chen, X D Zhang, H W Liang, H W Gao, S H Yu, Synthesis of nitrogen-doped porous carbon nanofibers as an efficient electrode material for supercapacitors, ACS Nano 6(8) 2012 7092-7102.
- [S10] J Zhang, W Zhang, H Zhang, J Pang, G Cao, M Han, Y Yang, Facile preparation of water soluble phenol formaldehyde resin-derived activated carbon by Na<sub>2</sub>CO<sub>3</sub> activation for high performance supercapacitors, Mater. Lett. 206 (2017) 67-70.
